# Supplementary material for: FUS-NLS/Transportin 1 Complex Structure Provides Insights into the Nuclear Targeting Mechanism of FUS and the Implications in ALS
Source: PubMed Central journal article supplement (PMC3466232; doi:10.1371/journal.pone.0047056), 2012-10-08

Figure S4

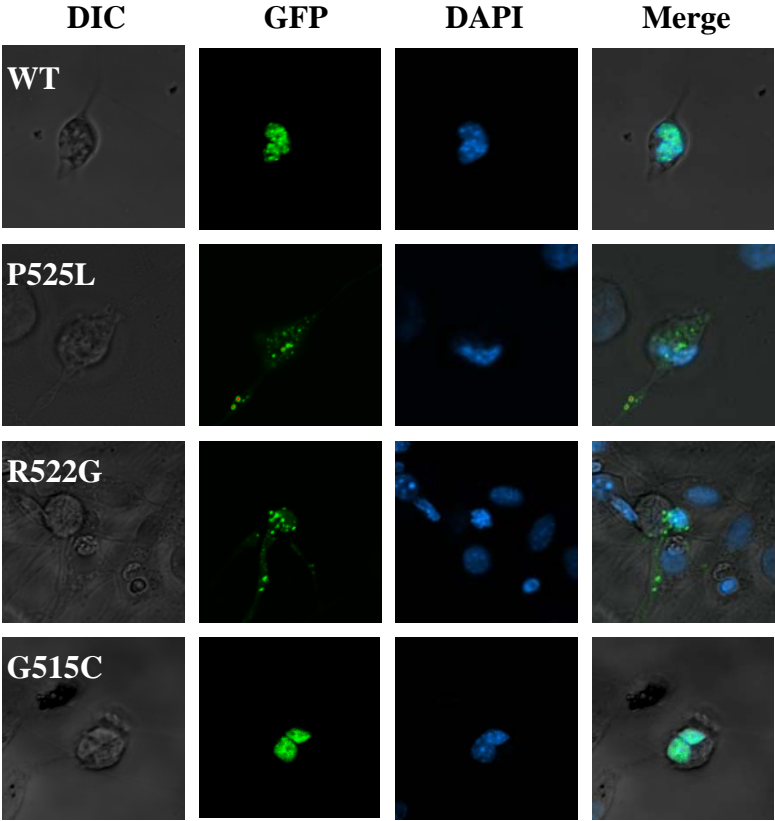

Supplement: pone.0047056.s004.pdf [file pone.0047056.s004.pdf]
