# Supplementary material for: FUS-NLS/Transportin 1 Complex Structure Provides Insights into the Nuclear Targeting Mechanism of FUS and the Implications in ALS
Source: PubMed Central journal article supplement (PMC3466232; doi:10.1371/journal.pone.0047056), 2012-10-08
Supplement: pone.0047056.s005.pdf [file pone.0047056.s005.pdf]

**Supplementary Table S1.** Summary of data-collection and refinement statistics

---

| <b>Data collection</b>                                   |                                                     |
|----------------------------------------------------------|-----------------------------------------------------|
| Space group                                              | <i>P2<sub>1</sub>2<sub>1</sub>2</i>                 |
| Unit-cell parameters (Å)                                 | <i>a</i> = 128.8, <i>b</i> = 158.3, <i>c</i> = 68.4 |
| Resolution range (Å)                                     | 50.0-3.0 (3.11-3.0)                                 |
| Number of total reflections                              | 142005 (14055)                                      |
| Number of unique reflections                             | 28798 (2811)                                        |
| Data completeness (%)                                    | 99.4 (99.6)                                         |
| $\langle I \rangle / \langle \sigma(I) \rangle$          | 14.7 (3.7)                                          |
| $R_{\text{merge}}$ (%) <sup>a</sup>                      | 10.6 (42.7)                                         |
| <b>Refinement</b>                                        |                                                     |
| Resolution range used for refinement (Å)                 | 30.0-3.0                                            |
| Number of reflections used                               | 28525                                               |
| $R_{\text{cryst}} / R_{\text{free}}$ (%) <sup>b</sup>    | 19.7 / 25.1                                         |
| r.m.s.d. bond length (Å)                                 | 0.006                                               |
| r.m.s.d. bond angles (°)                                 | 1.06                                                |
| Number of atoms modeled                                  | 6806                                                |
| Mean <i>B</i> factor for protein atoms (Å <sup>2</sup> ) | 19.5                                                |
| <b>Ramachandran plot statistics</b>                      |                                                     |
| Residues in most favored region (%)                      | 96.1                                                |
| Residues in additional allowed region (%)                | 3.9                                                 |
| Residues in disallowed region (%)                        | 0                                                   |

---

<sup>a</sup>  $R_{\text{merge}} = \frac{\sum_{hkl} \sum_i |I_i(hkl) - \langle I(hkl) \rangle|}{\sum_{hkl} \sum_i I_i(hkl)}$ , where  $\langle I(hkl) \rangle$  is the main value of  $I(hkl)$ .

<sup>b</sup>  $R_{\text{cryst}} = \frac{\sum ||F_{\text{obs}}| - |F_{\text{calc}}||}{\sum |F_{\text{obs}}|}$ , where  $F_{\text{obs}}$  and  $F_{\text{calc}}$  are observed and calculated structure factors.

The free *R* factor was calculated using 5% of reflections omitted from the refinement.

Numbers in parentheses represent the value for the highest resolution shell.
