# Supplementary material for: FUS-NLS/Transportin 1 Complex Structure Provides Insights into the Nuclear Targeting Mechanism of FUS and the Implications in ALS
Source: PubMed Central journal article supplement (PMC3466232; doi:10.1371/journal.pone.0047056), 2012-10-08
Supplement: pone.0047056.s006.pdf [file pone.0047056.s006.pdf]

**Supplementary Table S2.** Summary of hydrophobic contacts between Trn1 and FUS-NLS

|            | <b>FUS-NLS</b>                                                |   | <b>Trn1</b>                                                                                        |
|------------|---------------------------------------------------------------|---|----------------------------------------------------------------------------------------------------|
| Region I   | E523(C <sup>δ</sup> )                                         | ↔ | A499(C <sup>α</sup> and C <sup>β</sup> )                                                           |
|            | P525(C <sup>δ</sup> )                                         | ↔ | W460(C <sup>ζ2</sup> , C <sup>δ1</sup> , C <sup>δ2</sup> , C <sup>ε2</sup> , and C <sup>ε3</sup> ) |
|            | P525(C <sup>γ</sup> )                                         | ↔ | W460(C <sup>δ2</sup> , C <sup>ε3</sup> , and C <sup>γ</sup> )                                      |
|            | P525(C <sup>γ</sup> )                                         | ↔ | I457(C <sup>δ</sup> )                                                                              |
|            | P525(C <sup>γ</sup> and C <sup>β</sup> )                      | ↔ | L419(C <sup>δ1</sup> )                                                                             |
|            | Y526(C <sup>ζ</sup> and C <sup>ε2</sup> )                     | ↔ | W460(C <sup>η2</sup> )                                                                             |
|            | Y526(C <sup>ε2</sup> )                                        | ↔ | L419(C <sup>δ1</sup> )                                                                             |
|            | Y526(C <sup>δ1</sup> )                                        | ↔ | A381(C <sup>α</sup> )                                                                              |
|            | Y526(C <sup>ε2</sup> , C <sup>γ</sup> , and C <sup>δ2</sup> ) | ↔ | A381(C <sup>β</sup> )                                                                              |
|            | Y526(C <sup>β</sup> )                                         | ↔ | K377(C <sup>α</sup> , C <sup>β</sup> , and C <sup>γ</sup> )                                        |
| Region III | P508(C <sup>δ</sup> and C <sup>γ</sup> )                      | ↔ | I804(C <sup>δ</sup> )                                                                              |
|            | K510(C <sup>δ</sup> )                                         | ↔ | W730(C <sup>η2</sup> )                                                                             |
|            | K510(C <sup>β</sup> )                                         | ↔ | W730(C <sup>ε3</sup> )                                                                             |
|            | K510(C <sup>β</sup> )                                         | ↔ | N727(C <sup>γ</sup> )                                                                              |
|            | M511(C <sup>ε</sup> )                                         | ↔ | T766(C <sup>γ2</sup> and C <sup>β</sup> )                                                          |
|            | M511(C <sup>γ</sup> )                                         | ↔ | N726(C <sup>γ</sup> )                                                                              |
