# Supplementary material for: FUS-NLS/Transportin 1 Complex Structure Provides Insights into the Nuclear Targeting Mechanism of FUS and the Implications in ALS
Source: PubMed Central journal article supplement (PMC3466232; doi:10.1371/journal.pone.0047056), 2012-10-08
Supplement: pone.0047056.s007.pdf [file pone.0047056.s007.pdf]

**Supplementary Table S3.** Summary of polar/electrostatic interactions between Trn1 and FUS-NLS

|                   | <b>FUS-NLS</b>         |   | <b>Trn1</b>            |
|-------------------|------------------------|---|------------------------|
| <b>Region I</b>   | Y526(O <sup>η</sup> )  | ↔ | D384(O <sup>δ2</sup> ) |
|                   | R514(N <sup>η2</sup> ) | ↔ | S591(O <sup>γ</sup> )  |
|                   | R514(N <sup>η2</sup> ) | ↔ | D646(O <sup>δ2</sup> ) |
|                   | R514(N <sup>ε</sup> )  | ↔ | D646(O <sup>δ2</sup> ) |
|                   | H517(N <sup>δ1</sup> ) | ↔ | E588(O <sup>ε2</sup> ) |
|                   | R518(N <sup>η2</sup> ) | ↔ | E588(O)                |
|                   | R518(N <sup>η2</sup> ) | ↔ | S592(O <sup>γ</sup> )  |
| <b>Region II</b>  | R518(N <sup>η1</sup> ) | ↔ | D550(O <sup>δ1</sup> ) |
|                   | R521(N <sup>η2</sup> ) | ↔ | E588(O <sup>ε1</sup> ) |
|                   | R521(N <sup>η2</sup> ) | ↔ | D543(O <sup>δ2</sup> ) |
|                   | R521(N <sup>ε</sup> )  | ↔ | D543(O <sup>δ2</sup> ) |
|                   | R522(N <sup>η1</sup> ) | ↔ | T506(O <sup>γ1</sup> ) |
|                   | R522(N <sup>η1</sup> ) | ↔ | E509(O <sup>ε1</sup> ) |
|                   | R522(N <sup>η2</sup> ) | ↔ | E509(O <sup>ε2</sup> ) |
|                   | G509(O)                | ↔ | N726(N <sup>δ2</sup> ) |
| <b>Region III</b> | G509(O)                | ↔ | N770(N <sup>δ2</sup> ) |
|                   | K510(N <sup>ξ</sup> )  | ↔ | D693(O <sup>δ2</sup> ) |
